# Supplementary material for: Feeding and Management of Horses with and without Free Faecal Liquid: A Case–Control Study
Source: MDPI journal article supplement (doi:10.3390/ani11092552), 2021-08-30
Supplement: s1 [file s1]

Table S2. Basic information on horses with (case, n = 50) and without (control, n = 50) free faecal liquid and p-values from Chi<sup>2</sup>-test. Case and control horses within each pair were located on the same farm

| Characteristics                                                     | Case, n (%) | Control, n (%) | <i>p</i> -value |
|---------------------------------------------------------------------|-------------|----------------|-----------------|
| Sex                                                                 |             |                | 0.32            |
| Gelding                                                             | 27 (54)     | 22 (44)        |                 |
| Mare                                                                | 23 (46)     | 28 (56)        |                 |
| Breed type                                                          |             |                | 0.14            |
| Warmblood horses (and crossbreds)                                   | 21 (42)     | 19 (38)        |                 |
| Cold-blood horses (and crossbreds)                                  | 14 (28)     | 8 (16)         |                 |
| Hot-blooded horses                                                  | 4 (8)       | 3 (6)          |                 |
| Native breeds                                                       | 11 (22)     | 20 (40)        |                 |
| Coat colour                                                         |             |                | 0.90            |
| Grey                                                                | 3 (6)       | 7 (14)         |                 |
| Bay                                                                 | 22 (44)     | 13 (26)        |                 |
| Black                                                               | 5 (10)      | 12 (24)        |                 |
| Chestnut                                                            | 11 (22)     | 9 (18)         |                 |
| Paint/piebald                                                       | 2 (4)       | 2 (4)          |                 |
| Other (Palomino/Isabelline, Leopard pattern, Buckskin, Cremello)    | 7 (14)      | 7 (14)         |                 |
| Training discipline performed <sup>1</sup>                          |             |                | 0.07            |
| Dressage                                                            | 22 (44)     | 17 (34)        |                 |
| Show jumping                                                        | 13 (26)     | 11 (22)        |                 |
| Leisure riding                                                      | 32 (64)     | 34 (68)        |                 |
| Riding school                                                       | 5 (10)      | 7 (14)         |                 |
| Breeding show                                                       | 3 (6)       | 3 (6)          |                 |
| Breeding                                                            | 5 (10)      | 6 (12)         |                 |
| Racing                                                              | 4 (8)       | 10 (20)        |                 |
| Companion                                                           | 10 (20)     | 1 (2)          |                 |
| Academic art of riding                                              | 5 (10)      | 8 (16)         |                 |
| Breaking in                                                         | 4 (8)       | 5 (10)         |                 |
| Other (Western, Working equitation, Mounted archery, cross country) | 7 (14)      | 8 (16)         |                 |
| Training intensity                                                  |             |                | 0.60            |

|                                                                               |         |         |      |
|-------------------------------------------------------------------------------|---------|---------|------|
| Very low (maximum 30 min/day, 1-3 times/week, mainly walking)                 | 12 (24) | 11 (22) |      |
| Low (leisure riding, 30–60 min per day, 4–7 days/week, all gaits)             | 22 (48) | 23 (44) |      |
| Medium (riding school, more intense leisure riding, all gaits)                | 10 (20) | 9 (18)  |      |
| High (cross country, high-level show jumping, all gaits)                      | 1 (2)   | 1 (2)   |      |
| Very high (trotting and racing, high-level cross country training, endurance) | 1 (2)   | 1 (2)   |      |
| Breaking in                                                                   | 4 (8)   | 5 (10)  |      |
| Body condition score, BCS <sup>2</sup>                                        |         |         | 0.68 |
| <3                                                                            | 11 (22) | 5 (10)  |      |
| 3                                                                             | 26 (52) | 33 (66) |      |
| >3                                                                            | 13 (26) | 12 (24) |      |
| Ability of horse to keep desired BCS                                          |         |         | 0.35 |
| Easy keeper                                                                   | 17 (34) | 17 (34) |      |
| Normal                                                                        | 24 (48) | 30 (60) |      |
| Hard keeper                                                                   | 9 (18)  | 3 (6)   |      |

---

<sup>1</sup>Multiple disciplines could be selected in the questionnaire, resulting in the sum of horses for each discipline potentially exceeding the total number of horses in the study. <sup>2</sup> Body condition score according to Carroll and Huntington (1988).
